# Supplementary material for: GGCX-Associated Phenotypes: An Overview in Search of Genotype-Phenotype Correlations
Source: MDPI journal article supplement (doi:10.3390/ijms18020240), 2017-01-25
Supplement: s1 [file s1]

# Supplementary Materials: GGCX-Associated Phenotypes: An Overview in Search of Genotype-Phenotype Correlations

Eva Y. G. De Vilder, Jens Debacker and Olivier M. Vanakker

Table S3. Multiple sequence alignment of the GGCX amino acid residues 459-508 (NM000812.2) in 11 different species.

| Transcript Number<br>(Species Number) | Number of First<br>Amino Acid | GGCX Sequence                                      | Number of Last<br>Amino Acid |
|---------------------------------------|-------------------------------|----------------------------------------------------|------------------------------|
| NP_000812.2 (1)                       | 459                           | NVTEPQIYFDIWVSINDRFQQRIFDPRVDIVQAAWSPFQRTSWVQPLLMD | 508                          |
| XP_515586.2 (2)                       | 459                           | NVTEPQIYFDIWVSINDRFQQRIFDPRVDIVQAAWSPFQRTSWVQPLLMD | 508                          |
| XP_001086474.1 (3)                    | 459                           | NVTEPQIYFDIWVSINDRFQQRIFDPRVDIVQAAWSPFQRTSWVQPLLMD | 508                          |
| XP_532979.3 (4)                       | 459                           | NVTEPQIYFDIWVSINDRFQQRIFDPRVDIVQAAWSPFQRTSWVQPLLMD | 508                          |
| NP_776491.1 (5)                       | 459                           | NVTEPQIYFDIWVSINDRFQQRIFDPRVDIVQAAWSPFQRTSWVQPLLMD | 508                          |
| NP_062776.1 (6)                       | 459                           | NVTEPQIYFDIWVSINDRFQQRIFDPRVDIVQAAWSPFQRTSWVQPLLMD | 508                          |
| NP_113944.1 (7)                       | 459                           | NVTEPQIYFDIWVSINDRFQQRIFDPRVDIVQAAWSPFQRTSWVQPLLMD | 508                          |
| XP_003199342.1 (8)                    | 179                           | NISDPEIYFDIWVSINDRFQQRIFDPRVDIVQAAWSPFQRTSWVQPLLMD | 228                          |
| NP_001163323.1 (9)                    | 462                           | GR-NISYFDIWCSMNGRFQQRIFDPRVDIVQAAWSPFQRTSWVQPLLMD  | 510                          |

The arginine-residue at position 476 (yellow highlight) is part of a highly conserved 7 AA-long sequence (N-NDRFQQR-C) and the tryptophan-residue at position 493 (green highlight) is highly conserved among different species (11/11); 1: *homo sapiens*—human; 2: *pan troglodytes*—common chimpanzee; 3: *macaca mulatta*—rhesus macaque; 4: *canis lupus familiaris*—dog; 5: *bos taurus*—European cattle; 6: *mus musculus*—house mouse; 7: *rattus norvegicus*—brown rat; 8: *danio rerio*—zebrafish; 9: *drosophila melanogaster*—fly; 10: *anopheles gambiae str. PEST*—mosquito, 11: *xenopus tropicalis*—western clawed frog.
